# Supplementary material for: Effect of anaesthetic technique on neonatal morbidity in emergency caesarean section for foetal distress
Source: PubMed Central journal article supplement (PMC6239306; doi:10.1371/journal.pone.0207388), 2018-11-16
Supplement: pone.0207388.s004.pdf [file pone.0207388.s004.pdf]

ISRCTN15181117 <https://doi.org/10.1186/ISRCTN15181117>

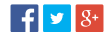

## The effect of anesthetic technique on neonatal morbidity in emergent cesarean section for fetal distress

**Condition category**      **Prospective/Retrospective**

Pregnancy and Childbirth      Retrospectively registered

**Date applied**      **Overall trial status**

12/12/2015      Completed

**Date assigned**      **Recruitment status**

15/02/2016      No longer recruiting

**Last edited**

15/02/2016

### Plain English Summary

Background and study aims

An emergent (or emergency) caesarean section is one of the biggest challenges faced by an obstetric anaesthetist. As the outcome for both mother and unborn baby depends on the coordination and vigilance of the obstetrician and anaesthetist, the decision on what anesthetic technique to use can be of paramount importance. Current guidelines suggest regional (local) anaesthesia should be given in preference to general anaesthesia for elective (pre-planned) caesarean sections. However, for an emergency caesarean section, there may not be enough time to give a regional anaesthetic. Evidence does suggest that regional anaesthesia should be chosen in preference to general anaesthesia if there is time. However, there are few published studies looking at the neonatal morbidity (disease causing) for emergency caesareans where the baby has been identified as being in distress (foetal distress). In this study, neonatal morbidity will be compared for emergency caesarean sections carried out using regional anaesthesia compared with general anaesthesia.

Who can participate?

Women aged 18-45 in labour where their unborn baby is showing signs of distress.

What does the study involve?

For each patient in the study, the senior anaesthetist decides the type of anaesthesia according to both national guidelines and patients' approval. The patients are divided into two groups, general anaesthesia group (group g) or regional anaesthesia group (group r). Heart rate, arterial tension pressure and demographic data are all recorded for each patient. Once the baby is born, APGAR scores (a way of summarising the health of a newborn baby) are recorded one minute after birth and then again at 3 minutes and 5 minutes after birth. If the babies condition is critical and there are umbilical blood gases (suggesting foetal distress) this data is also recorded. After the operation, the neonates are followed up until their discharge from hospital. Any morbid (disease-causing) conditions are also recorded.

What are the possible benefits and risks of participating?

There is no risk for the participants because it is an observational study.

Where is the study run from?

Suleymaniye Birth and Women's Health Education and Research Hospital, Istanbul (Turkey)

When is the study starting and how long is it expected to run for?

July 2015 to December 2015

Who is funding the study?

Suleymaniye Birth and Women's Health Education and Research Hospital, Istanbul (Turkey)

Who is the main contact?

Dr Ipek Saadet Edipoglu

### Trial website

### Contact information

**Type**

Scientific

**Primary contact**

Dr Ipek Saadet Edipoglu

**ORCID ID**

**Contact details**

Suleymaniye Birth And Women's Health Education And Research Hospital  
Telsiz Mah. Balıklı Kazlıcesme Yolu No:1 Zeytinburnu  
Istanbul  
34116  
Turkey

---

**Additional identifiers****EudraCT number****ClinicalTrials.gov number****Protocol/serial number**

N/A

---

**Study information****Scientific title**

The effect of anaesthetic technique on neonatal morbidity in emergent caesarean section for fetal distress: a prospective observational study

**Acronym****Study hypothesis**

To investigate the effect of anesthetic technique on neonatal morbidity in emergent cesareans by observing if administering regional anesthesia or general anesthesia influences the morbidity of the neonate.

**Ethics approval**

Research Hospital Clinical Studies Ethical Committee, 29/06/2015, ref: 2015/127

**Study design**

Single centered prospective observational study.

**Primary study design**

Observational

**Secondary study design**

Cohort study

**Trial setting**

Hospitals

**Trial type**

Treatment

**Patient information sheet**

Not available in web format, please use contact details to request a participant information sheet

**Condition**

Fetal distress and anesthetic technique

**Intervention**

We are going to observe emergent cesarean sections which are diagnosed as fetal distress. We are not going to intervene regarding the patients anesthetic choice. Regional anesthesia or general anesthesia will be applied according to the patients indication. The consultant anesthesiologist makes the decision about the type of anesthesia for emergent cesarean sections according to our national guidelines in our hospital. We are just going to observe and divide them into two groups: general anesthesia group and regional anesthesia group. The following will be recorded in all cases:

1. All patients peri-operative heart rate and mean arterial pressures
2. All neonates APGAR scores at 1, 3 and 5 minutes
3. The need for mechanical ventilation will also be recorded.
4. All morbid conditions

**Intervention type**

Procedure/Surgery

**Phase****Drug names****Primary outcome measure**

Neonatal morbidity, measured with APGAR scores in 1st, 3rd, 5th minutes, and umbilical blood gas (if indicated). After the operation we will follow neonates until discharge and record any morbid conditions. We define morbidity as 5-minute Apgar score (APGAR5) <7, any need for mechanical ventilation, any neonatal intensive care unit entrance and any respiratory insufficiency symptoms.

**Secondary outcome measures**

Morbidity of the mother if administering regional anesthesia compared to general anesthesia

**Overall trial start date**

01/07/2015

**Overall trial end date**

06/12/2015

**Reason abandoned (if study stopped)**

---

**Eligibility****Participant inclusion criteria**

1. Female
2. Age between 18-45
3. BMI<40
4. Patients diagnosed as being in fetal distress.
5. Patients without neurological diseases
6. Patients consenting to join the study

**Participant type**

Patient

**Age group**

Adult

**Gender**

Female

**Target number of participants**

60 patients will be included.

**Participant exclusion criteria**

1. Age less than 18 and older than 45
2. BMI>40
3. Patients that refuse to join study

**Recruitment start date**

01/07/2015

**Recruitment end date**

06/12/2015

---

**Locations****Countries of recruitment**

Turkey

**Trial participating centre**

Suleymaniye Birth And Women's Health Education And Research Hospital  
Telsiz Mah. Balıklı Kazlıcesme Yolu No:1 Zeytinburnu  
Istanbul  
34116  
Turkey

---

**Sponsor information****Organisation**

Suleymaniye Birth And Women's Health Education And Research Hospital

**Sponsor details**

Telsiz Mah. Balıklı Kazlıcesme Yolu No:1 Zeytinburnu  
Istanbul  
34116  
Turkey

**Sponsor type**

Government

**Website**

---

## Funders

### Funder type

Hospital/treatment centre

### Funder name

Suleymaniye Birth And Women's Health Education And Research Hospital (Turkey)

### Alternative name(s)

### Funding Body Type

### Funding Body Subtype

### Location

---

## Results and Publications

### Publication and dissemination plan

### Intention to publish date

01/02/2016

### Participant level data

To be made available at a later date

### Basic results (scientific)

### Publication list

### Publication citations

---

## Additional files

---

## Editorial Notes

---

---

[About](#)  
[Governance](#)  
[Why register?](#)

[Search tips](#)  
[Resources](#)  
[FAQs](#)

[Follow us on Twitter](#)  
[Publish with BioMed Central](#)  
[Contact us](#)
